# Supplementary material for: Genomic and Cytogenetic Analysis of Synthetic Polyploids between Diploid and Tetraploid Cotton (Gossypium) Species
Source: MDPI journal article supplement (doi:10.3390/plants12244184), 2023-12-17
Supplement: s1 [file s1]

**Table S1. The panel of SSR markers associated with economically important traits**

| <b>No.</b> | <b>SSR marker</b> | <b>Chr. No.*</b> | <b>Reference</b> |
|------------|-------------------|------------------|------------------|
| 1          | BNL1122           | D16, A07         | [56]             |
| 2          | BNL1421           | A13              | [57]             |
| 3          | BNL1694           | D16, A07         | [57,58]          |
| 4          | BNL2496           | D17              | [59]             |
| 5          | BNL3140           | D23, A09         | [56]             |
| 6          | BNL3171           | D21              | [60]             |
| 7          | BNL3347           | A05              | [61]             |
| 8          | BNL3436           | D25              | [56]             |
| 9          | BNL3452           | D19, A05         | [62]             |
| 10         | BNL3594           | A06              | [62]             |
| 11         | BNL3601           | A05              | [57]             |
| 12         | BNL3792           | A08              | [62]             |
| 13         | BNL3932           | A06, A02         | [63]             |
| 14         | BNL4030           | D22              | [64]             |
| 15         | CGR5602           | A11              | [65]             |
| 16         | CGR5732           | D19, A05         | [66]             |
| 17         | CGR5758           | A09              | [67]             |
| 18         | CGR6103           | A08, D24         | [68]             |
| 19         | NAU0923           | D09              | [69]             |
| 20         | NAU1043           | A07              | [56]             |
| 21         | NAU1071           | A03              | [70]             |
| 22         | NAU1093           | A06              | [70]             |
| 23         | NAU1151           | A12              | [62]             |
| 24         | NAU1190           | A03              | [70]             |
| 25         | NAU1221           | D05              | [71]             |

| No. | SSR marker | Chr. No.* | Reference |
|-----|------------|-----------|-----------|
| 26  | NAU1230    | A05       | [72]      |
| 27  | NAU1255    | D05       | [62]      |
| 28  | NAU2026    | A05       | [73]      |
| 29  | NAU2300    | A13       | [62]      |
| 30  | NAU2437    | A01       | [62]      |
| 31  | NAU2508    | D10       | [62]      |
| 32  | NAU7049    | A10       | [62]      |
| 33  | BNL1231    | A03       | [73]      |
| 34  | BNL2634    | D07       | [56]      |
| 35  | BNL1167    | A04       | [65]      |
| 36  | BNL1666    | D01       | [74]      |
| 37  | CGR5866    | D11       | [75]      |
| 38  | CIR0139    | D05       | [76]      |
| 39  | CIR0246    | D02       | [77]      |
| 40  | DPL0473    | D02       | [78]      |
| 41  | DPL0590    | A06       | [79]      |
| 42  | Gh262      | A05       | [78]      |
| 43  | Gh433      | A06       | [80]      |
| 44  | Gh591      | D04       | [81]      |
| 45  | Gh592      | A13       | [76]      |
| 46  | HAU0423    | A11       | [65]      |
| 47  | HAU0878    | A05       | [81]      |
| 48  | NAU0458    | D01       | [82]      |
| 49  | NAU0837    | A06       | [56]      |
| 50  | NAU0868    | D03       | [83]      |
| 51  | CGR6078    | A01       | [84]      |

| No. | SSR marker | Chr. No.* | Reference |
|-----|------------|-----------|-----------|
| 52  | DPL0131    | D11       | [66]      |
| 53  | JESPR204   | D13       | [77]      |
| 54  | NAU2443    | D13       | [85]      |
| 55  | BNL0226    | A03       | [86]      |
| 56  | BNL0530    | D04       | [86]      |
| 57  | BNL1053    | D11       | [87]      |
| 58  | BNL3424    | D03       | [62]      |
| 59  | CGR5102    | D08       | [88]      |
| 60  | CGR5597    | A01       | [89]      |
| 61  | Gh034      | A13       | [82]      |
| 62  | Gh056      | D07       | [72]      |
| 63  | Gh110      | D10       | [82]      |
| 64  | Gh132      | D21       | [90]      |
| 65  | Gh243      | A12       | [90]      |
| 66  | Gh247      | A09       | [65]      |
| 67  | NAU2002    | D07       | [91]      |
| 68  | NAU2265    | A05       | [92]      |
| 69  | NAU2276    | D09       | [90]      |
| 70  | NAU2277    | A01       | [21]      |
| 71  | NAU2317    | A10       | [93]      |
| 72  | NAU2336    | D14       | [94]      |

**Table S2. Polymorphic SSR markers, and their polymorphism information content (PIC) and heterozygosity (He) values**

| Marker  | Forward primer (5'-3')    | Reverse primer (5'-3')       | Molecular weight (bp)        | PIC   | He    | Associated trait                                           | Chr. No* | Reference |
|---------|---------------------------|------------------------------|------------------------------|-------|-------|------------------------------------------------------------|----------|-----------|
| BNL0226 | TTATTCTCACAGCCGGAACC      | TTCACCCTCTCGCTTCTCAT         | 200, 230                     | 0.353 | 0.459 | Fiber quality                                              | A03      | [86]      |
| BNL0530 | CGTAGGATGGAAACGAAAGC      | GCCACACTTTTCCCTCTCAA         | 120, 130, 180                | 0.374 | 0.498 | Fiber quality                                              | D04      | [11,95]   |
| BNL1053 | AGGGTCTGTCATGGTTGGAG      | CATGCATGCGTACGTGTGTA         | 190, 200                     | 0,280 | 0,336 | Fiber quality                                              | D11      | [87]      |
| BNL1122 | TCGATAACGGCTATAGTAATCTCTC | CAACAAATAAGCAGCCAAGAAA       | 170, 180                     | 0.325 | 0.408 | Fiber strength                                             | D16, A07 | [56]      |
| BNL1231 | TAATAAAAGGGAAAGGAAAGAGTT  | TATGGTCTAGAATATTCCCTCG       | 180, 190                     | 0.324 | 0.408 | Plant height, fruit branch number                          | A03      | [73,96]   |
| BNL1421 | TGAAGATTGGAGGCAATTG       | GAAATCAAGCCTCAATTCGG         | 190, 210                     | 0.370 | 0.490 | Lint cotton yield, micronaire                              | A13      | [57]      |
| BNL1666 | TGTCAGAAAAGTTTTCCAAGG     | AGATCATATTTAAAAGAAAAAGAAAACC | 110, 120                     | 0.324 | 0.408 | Plant height, dry stem weight                              | A01      | [74]      |
| BNL1694 | CGTTTGTTTTCTGTAAACAGG     | TGGTGGATTACATCCAAAG          | 210, 250                     | 0.280 | 0.337 | Seed index, fiber length                                   | D16, A07 | [57,58]   |
| BNL2496 | TCGAAATGAATTTAGATGACCA    | TCCTTTTTTTGTACTTCTCTTGC      | 95, 110                      | 0.280 | 0.337 | Aspartic Acid, Serine, Glycine, Alanine, Arginine, Proline | D17      | [59]      |
| BNL2634 | AACAACATTGAAAGTCGGGG      | CCCACTCTCTTATTTTTTC          | 200, 230, 250, 280           | 0.369 | 0.489 | Fiber length, fiber strength                               | D07      | [56]      |
| BNL3140 | CACCATTGTGGCAACTGAGT      | GGAAAAGGGAAAGCCATTGT         | 100, 110                     | 0.325 | 0.408 | Fiber strength                                             | D23, A09 | [56]      |
| BNL3171 | GAAAAATTGAGGAAGGACATACG   | GGCCACAACCGAATTTACTG         | 100, 200                     | 0.375 | 0.500 | Fiber strength                                             | D21      | [60,97]   |
| BNL3347 | AGACTGACATGCAGCTTCCA      | ATCTTAATTTTGAGTATAGGATAGGGG  | 100, 130                     | 0.354 | 0.459 | Hull percentage                                            | A05      | [61]      |
| BNL3424 | TGTGCCGTCTCAAAATGAAG      | AAGACCAATCTGTTGCCAGC         | 160, 180                     | 0,325 | 0,408 | Relative malondialdehyde                                   | D03      | [62]      |
| BNL3436 | AACATAGCCTACCATTGCCG      | TTGTTTGCCAAATTTGAAGC         | 190, 200, 500, 550, 800      | 0.338 | 0.431 | Fiber length, fiber micronaire                             | D25      | [56]      |
| BNL3452 | TGTAAGTGAAGCAGCCGTACG     | GCCAAAGCAGAGTGAGATCC         | 170, 190                     | 0.325 | 0.408 | Relative malondialdehyde                                   | D19, A05 | [62]      |
| BNL3601 | TTCCGTTGATGGAAATTGAA      | ACAAGAATGCGTGTGTCTGC         | 150, 180, 220, 320, 500, 700 | 0.375 | 0.500 | Maturity, cell wall thickness                              | A05      | [57]      |
| BNL3792 | TTCGAGATCCCCTGTTCTGA      | CATATTCAGTCAAACCAAACG        | 240, 550, 740, 1000, 1300    | 0.269 | 0.320 | Relative plant height                                      | A08      | [62]      |
| BNL3932 | TCGGGATTTTTATGGCAAAG      | GAACACTCAACAAGGGGGAA         | 240, 250                     | 0.375 | 0.500 | FOV resistance                                             | A06, A02 | [63]      |
| CGR5597 | ACATGGTGGGAATGAGAAGC      | AATGTAGTGACGGGCCTTTG         | 170, 480                     | 0,124 | 0,132 | VW resistance                                              | A01      | [89]      |
| CGR5602 | ATCGCCATTGTTTACTGCTA      | ACCCTTCCACCATTAACCC          | 130, 150                     | 0.325 | 0.408 | Fiber length                                               | A11      | [65]      |
| CGR5732 | GCCAAGGTCATTCTGAAA        | TATAGGGCTCATCAGGGTGG         | 140, 160                     | 0.280 | 0.337 | Fiber strength                                             | D19, A05 | [66]      |

| Marker   | Forward primer (5'-3')       | Reverse primer (5'-3')       | Molecular weight (bp)             | PIC   | He    | Associated trait                                                              | Chr. No* | Reference |
|----------|------------------------------|------------------------------|-----------------------------------|-------|-------|-------------------------------------------------------------------------------|----------|-----------|
| CGR5866  | GCTTAGGTTGTATCCTTATTCG       | CCCTTTGTTCAATTTCTCGTG        | 100, 140                          | 0.280 | 0.336 | Fiber quality                                                                 | D11      | [75]      |
| CGR6078  | CATGCAAGAAAGCTGCTCAA         | TAGGCATGTGTCTCCGTGTG         | 90, 110                           | 0.324 | 0.408 | Boll weight, fiber length, fiber strength, fiber elongation, fiber uniformity | A01      | [84]      |
| CGR6103  | CAAAGGATGGGACACAGGTAA        | TGCATTAGATACCGAAATGAGC       | 100, 120                          | 0.325 | 0.408 | Fiber length                                                                  | A08, D24 | [68]      |
| CIR0139  | AAACAAATGGAGAGGGT            | ACCTGTGGTCTGCAAT             | 160, 180                          | 0.280 | 0.336 | Fiber quality                                                                 | D05      | [76]      |
| CIR0246  | TTAGGGTTTAGTTGAATGG          | ATGAACACACGCACG              | 170, 200, 250, 300, 340, 400, 450 | 0.372 | 0.494 | Salt tolerance                                                                | D02      | [77]      |
| DPL0131  | ACATACGGGTTGAAATGTACTCCT     | ATGAATGCAGATCATTACGCCT       | 190, 210                          | 0.324 | 0.408 | Fiber elongation, fiber strength,                                             | D11      | [66]      |
| DPL0473  | CGTTACAGGCGTAACTAAAGAGGT     | ATGTATATGACATTGAGTGGCTGC     | 180, 200                          | 0.324 | 0.408 | FOV resistance                                                                | D02      | [78]      |
| DPL0590  | GATTTACTTTAAGGAGGCGAAAC      | AAAGGTACACTCATGCGACTGAC      | 220, 250                          | 0.280 | 0.336 | Fiber quality                                                                 | A06      | [79]      |
| Gh056    | TCCATTAGACAAAGTTTTCTAAAGTTC  | TGAGACTTCCAACCAGATACAG       | 80, 110                           | 0.324 | 0.408 | Fiber quality                                                                 | D07      | [72]      |
| Gh110    | ACCATCCCAAAGAATCATCCTC       | ACTAAAACCAAGGCAATAAAGTG      | 180, 190                          | 0.280 | 0.336 | Fiber quality                                                                 | D10      | [82]      |
| Gh243    | CAGAAGGTTATGCAAACAACATGCA    | CTAAACTCTCTCTGCTGTGTTC       | 60, 150, 160                      | 0.369 | 0.489 | FOV resistance                                                                | A12      | [90]      |
| Gh247    | CTTCTTCCGCCACGTAAGTCC        | CAGCCTAACCAAGAACCCAATCG      | 115, 160                          | 0.517 | 0.594 | Fiber micronaire                                                              | A09      | [65]      |
| Gh262    | GTCAACAACCTTAAAATTGCCATAGGT  | TGGACTACCAATTAAGTTGCCACG     | 150, 185, 200                     | 0.374 | 0.498 | FOV resistance                                                                | A05      | [78]      |
| Gh433    | TACCACATTGGATGTTTGCAAACCC    | ATAGCAAAGTGAATCACTCCAAGC     | 115, 170, 185                     | 0.304 | 0.375 | VW resistance                                                                 | A06      | [35]      |
| Gh592    | TTGTTATCTAACTTCTGTTACTCCTAAC | TTGTTTAGCTCTTCTATACTTGAATTCC | 50, 100, 110                      | 0.324 | 0.408 | Fiber quality                                                                 | A13      | [76]      |
| HAU0423  | CGATGGAAGAAAAATCGAAA         | ATATTTCGACCAAGGAGTCG         | 170, 190                          | 0.324 | 0.408 | VW resistance                                                                 | A11      | [65]      |
| HAU0878  | TCATTCCTGAAACCCAAAAT         | CTAACAGGGGTGACATAGGG         | 120, 140                          | 0.280 | 0.336 | Fiber quality                                                                 | A05      | [81]      |
| JESPR204 | CTCCAGGTTCAATGGTCTG          | GCCATGTTGGACAAGTAGTC         | 160, 190                          | 0.324 | 0.408 | Seedling period, bud period, flower and boll period, salt tolerance           | D13      | [77]      |
| NAU0458  | AGGACTTGTCACGTGCTTC          | TTTGATTCTTTTCGGCTGCT         | 140, 195, 280, 500, 680           | 0.369 | 0.489 | Salt tolerance                                                                | D01      | [98,99]   |
| NAU0868  | GGCAAAACCATAAGGGTAAC         | TAGCGTGAGATTGTGGCTTA         | 190, 210                          | 0.280 | 0.336 | Fiber quality                                                                 | D03      | [83]      |
| NAU0923  | GGAATTCAAGGTTGAAGGAG         | GGAATTCAAGGTTGAAGGAG         | 210, 230                          | 0.325 | 0.408 | Fiber quality                                                                 | D09      | [69]      |
| NAU1043  | GTATCCGCCCCACAAATAAAG        | GCATCGTGAGAGAAAGTGAA         | 220, 290                          | 0.280 | 0.336 | Fiber quality                                                                 | A07      | [56]      |

| Marker              | Forward primer (5'-3') | Reverse primer (5'-3') | Molecular weight (bp)      | PIC   | He    | Associated trait                                                                              | Chr. No* | Reference |
|---------------------|------------------------|------------------------|----------------------------|-------|-------|-----------------------------------------------------------------------------------------------|----------|-----------|
| NAU1093             | AAATGGCGTGCTTGAAATAC   | TGTGATGAAGAACCTCTCA    | 150, 190                   | 0.353 | 0.459 | VW resistance                                                                                 | A06      | [70]      |
| NAU1151             | TGGTTGCTTTGTATTGCTTG   | CGTACTTGCGAAAGAGAACA   | 100, 200                   | 0.375 | 0.50  | Relative malondialdehyde                                                                      | A12      | [62]      |
| NAU1190             | CCATGTCCGTATCCATGTTA   | TAAGGCAAGATAGGGTCAGG   | 220, 250, 280              | 0.369 | 0.489 | Fiber quality                                                                                 | A03      | [70]      |
| NAU1221             | CATGCAAATCCATGCTAGAG   | AGGTTTCTTTGGTGGTAAA    | 240, 260                   | 0.324 | 0.408 | FOV resistance                                                                                | D05      | [71]      |
| NAU1230             | CATGCAAATCCATGCTAGAG   | TCAAAAGGTTCTTTGGTGGT   | 230, 250                   | 0.324 | 0.408 | Fiber quality                                                                                 | A05      | [72]      |
| NAU1255/<br>NAU1042 | CATGCAAATCCATGCTAGAG   | GGTTTCTTTGGTGGTAAAAC   | 230, 250                   | 0.324 | 0.408 | Relative root dry matter                                                                      | D05      | [62]      |
| NAU2002             | GCCCTTTTTGGTAGATGAAC   | ATCACTTCAGCTGGGGTTT    | 420, 470                   | 0,324 | 0,408 | Fiber strength                                                                                | D07      | [91]      |
| NAU2026             | GAATCTCGAAAACCCCATCT   | ATTGGAAGCGAAGTACCAG    | 180, 200, 210              | 0.296 | 0.362 | Plant height                                                                                  | A05      | [73]      |
| NAU2277             | GAACTAGCCACATGATGCAC   | TTGTTGAGGCATTAGTTTGC   | 120, 140                   | 0,551 | 0,622 | Drought tolerance                                                                             | A01      | [21]      |
| NAU2317             | GACTCCAGCCTTCACACAT    | TGGAAGAGTATAACGGCAGA   | 180, 190                   | 0,475 | 0,545 | Fiber quality                                                                                 | A10      | [93]      |
| NAU2336             | TGGAAGGAAGAGGAGAGA     | CCCTGAAGTTGTCAAGCTCT   | 140, 150, 160,<br>180      | 0,516 | 0,581 | Biotic factors, cotton leaf curl<br>disease, seed cotton yield per plant                      | D02      | [94]      |
| NAU2443             | CGTTGAGAAGGAAAGCCTAA   | AGCCTGCTTCATGTTCTTTT   | 100, 120, 140,<br>170, 190 | 0.296 | 0.362 | Fiber strength, fiber elongation,<br>fiber uniformity height of first<br>fruiting branch node | D13      | [85]      |
| NAU7049             | AGGTACCTCTCCTGACTCT    | AATCTTCTTGAAATCGAAC    | 250, 350                   | 0.280 | 0.336 | Relative superoxide dismutase                                                                 | A10      | [62]      |
